# Supplementary material for: Peroxidase-mimicking Prussian blue nanoparticles versus HRP for high colorimetric detection of miRNA-141 in competitive RNA–RNA systems
Source: Royal Society of Chemistry journal article supplement (doi:10.1039/d4sd00187g), 2024-01-01
Supplement: d4sd00187g1.pdf [file d4sd00187g1.pdf]

## Supplementary information for:

# Peroxidase-mimicking Prussian Blue Nanoparticles versus HRP for High Colorimetric Detection of miRNA-141 in Competitive RNA-RNA Systems

Maliana El Aamri<sup>1</sup>, Hasna Mohammadi<sup>1</sup> and Aziz Amine<sup>1,\*</sup>

<sup>1</sup> Hassan II University of Casablanca, Faculty of Sciences and Techniques, Laboratory of Process Engineering and Environment, Chemical Analysis and Biosensors Group, P.A 146, Mohammedia, Morocco.; [Maliana.elaamri@etu.fstm.ac.ma](mailto:Maliana.elaamri@etu.fstm.ac.ma); [hasna.mohammadi@fstm.ac.ma](mailto:hasna.mohammadi@fstm.ac.ma); [azizamine@yahoo.fr](mailto:azizamine@yahoo.fr);

\* Correspondence: [azizamine@yahoo.fr](mailto:azizamine@yahoo.fr) (A.Amine);

**Table S1:** Nucleic acids employed in the present work.

| Nucleic acid                             | Sequence (5'–3')                                                                   |
|------------------------------------------|------------------------------------------------------------------------------------|
| Target microRNA-141                      | UAA CAC UGU CUG GUA AAG AUG G                                                      |
| Probe (NH <sub>2</sub> -P)               | NH <sub>2</sub> -(CH <sub>2</sub> ) <sub>6</sub> -AAACCA TCT TTA CCA GAC AGT GTT A |
| Biotin-microRNA-141                      | Biotin-UAA CAC UGU CUG GUA AAG AUG G                                               |
| microRNA-21 (non-complementary target)   | UAGCUUAUCAGACUGAUGUUGA                                                             |
| microRNA-125a (non-complementary target) | UCCCUGAGACCCUUUAACCUGUGA                                                           |
| microRNA-146a (non-complementary target) | UGAGAACUGAAUCCAUGGGUU                                                              |
| microRNA-155 (non-complementary target)  | UUAAUGCUAAUCGUGAUAGGGGUU                                                           |
| microRNA-222 (non-complementary target)  | AGCUACAUCUGGCUACUGGGUCUC                                                           |

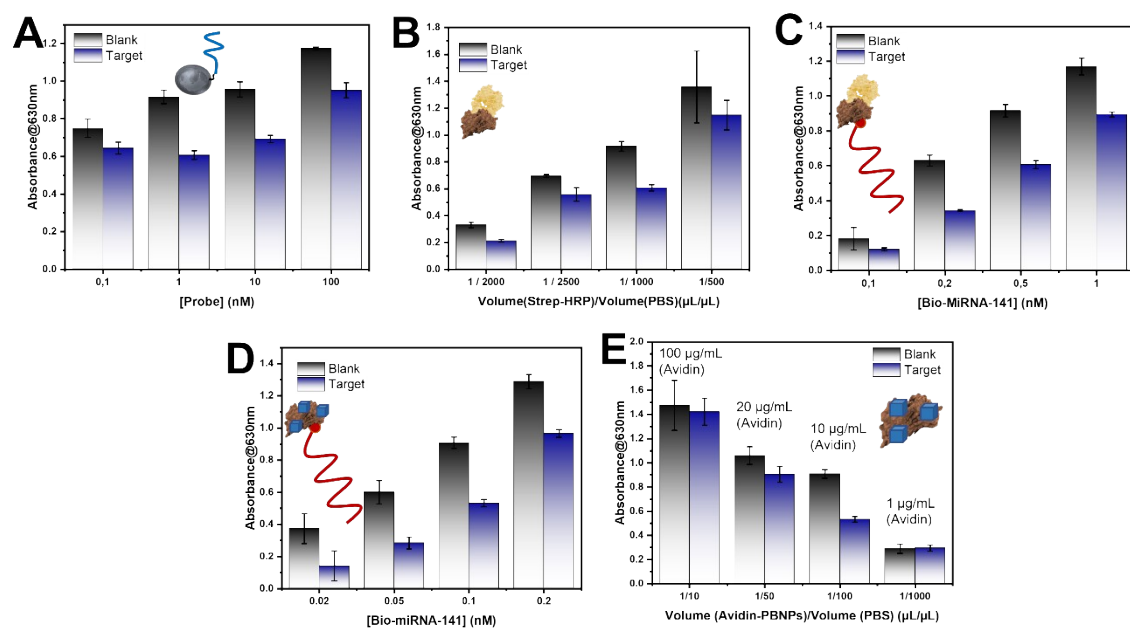

**Figure S1:** Optimization of parameters of both developed biosensors-based competitive systems. (A) Probe concentration, (B) Volume of Strep-HRP, (C) Bio-MiRNA-141 concentration for HRP based biosensor, (D) Bio-MiRNA-141 concentration for PBNPs based biosensor and (E) Volume of Avidin-PBNPs conjugate. Three parallel experiments yielded error bars.

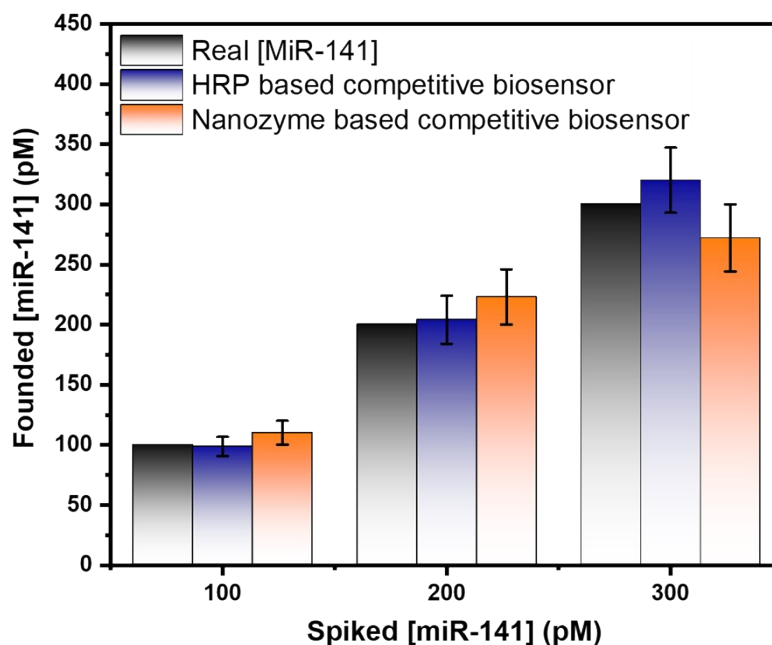

**Figure S2:** MiRNA-141 detection in artificial human serum by both developed biosensors (n=3).
